# Supplementary material
Source: Springer Nature journal article supplement (https://www.springermedizin.de/resource/supplementary/12916_2010_403_MOESM3_ESM.pdf/9599876)

## TriVac Model (+/- 20% change)

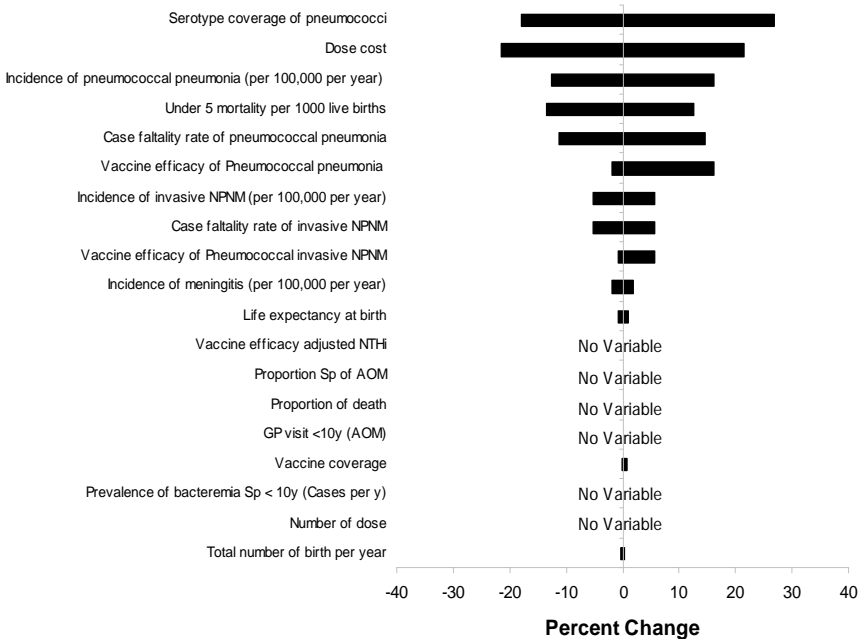

## SUPREMES Model

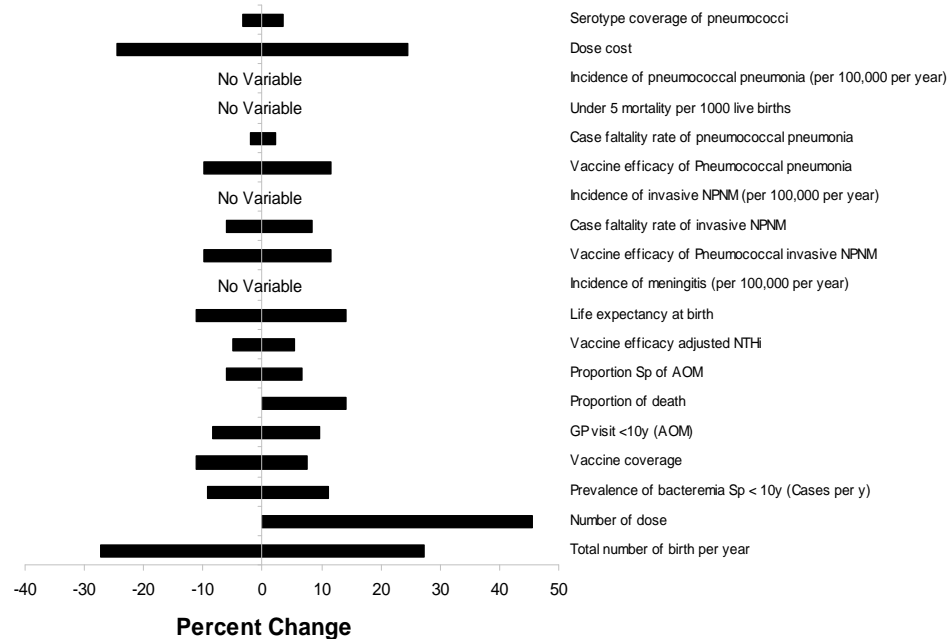

Supplement: MOESM3 [file 9599876]
